# Appropriateness of hospital use

## Report from an Italian study

G. APOLONE, G. FELLIN, A. TAMPIERI, E. BONANONI, P.F. CROSTI, E. LANZI, G. MEREGALLI, G. TROCINO, A. LIBERATI \*

The objective was to assess the extent of inappropriate hospital admission and stay in an adult patient population and identify potential correlates of such inappropriateness. Design: a cross-sectional survey on a sample of 1,082 in-patients using a modified version of the appropriateness evaluation protocol (AEP). Setting: adult acute departments in a 950 bed teaching hospital in the greater Milan area. The patient sample consisted of patients cared for at 1 of the participating departments on any of 3 index days between October 1989 and June 1990. The results show that overall 27% of the admissions and 40% of the hospital days were inappropriate. The rate of inappropriate admissions was higher for patients admitted during week days and was also significantly associated with the admitting ward and the age of the patient. Inappropriate hospital-day stays were related to the type of ward and to the location during the stay, with those sampled in the later part of their stay having the highest rate of inappropriateness. Most of the hospital days rated as not appropriate did not require any further stay (75%). Conclusions: a substantial proportion of hospital use was found to be medically unnecessary and, for the most part, due to hospital functioning or the behaviour of the doctors. Some properties of the AEP (high inter-rater reliability, predictivity of expected associations) were also confirmed. The basic features of this revised version of the AEP make it a good candidate for becoming of great importance in monitoring the effect of the changes the Italian National Health Service is currently undergoing.

**Key words:** appropriateness of admission, appropriateness of stay, hospital utilization

Concerns about health care costs seem to have spread both in the US and Europe<sup>1</sup> together with increasing critical attention to the effectiveness of medical care. The assessment of hospital utilization finds its justification in the awareness that part of such utilization may be inappropriate either from the medical and economic viewpoints, i.e. patients receive either services that provide no significant benefits or services that could be rendered, at lower cost, elsewhere. Although several methods have been proposed to assess the medical necessity of hospitalization, all suffer from high subjectivity, low reliability, cost and complexity of implementation.<sup>2-4</sup> The appropriateness evaluation protocol (AEP) has been shown to overcome most of these drawbacks while still retaining good validity and reliability.<sup>5-7</sup> The AEP is a utilization review tool that has certain features that make it especially attractive. First, it is diagnosis independent and based on a set of explicit criteria whose compliance leads to the classification of a hospital day as appropriate. Secondly, estimates of the level of inappropriateness can be based on a cross-sectional analysis of a single day of

patient care making it vastly simpler and cheaper than the longitudinal or concurrent assessment on which most approaches are based. After a pilot investigation carried out in 1988 to test the feasibility and acceptability of the AEP in Italy,<sup>8</sup> a larger study was undertaken to confirm the potential of the modified Italian version as a screening tool for subsequent quality assurance activities. This study had 3 objectives:

- to assess the reliability of the Italian version of the AEP,
- to measure the extent of inappropriate hospital admissions and days of care and
- to identify potential factors associated with inappropriate hospital utilization.

Based on the findings from the pilot study, we expected a relatively large amount of inappropriate hospital days. Moreover, we also predicted significant differences across admitting wards, according to the overall length of stay (LOS) and location within the stay of the day reviewed.

### THE ITALIAN HEALTH CARE DELIVERY SYSTEM

Since approval of the 'National Health Service' (NHS) bill in 1978, health care has been provided largely free of charge at the point of consumption with no restrictions on eligibility, duration or level of care. Only a limited co-payment has been requested since the early 1980s for drugs, specialists' visits and tests for out-patient care. No co-payment was required for hospital care. Health care for a population of over 60 million inhabitants is provided through public facilities (public hospitals accounting for 82% of the total number of beds in 1991) or by contract-

\* G. Apolone<sup>1</sup>, G. Fellin<sup>2</sup>, A. Tampieri<sup>2</sup>, E. Bonanoni<sup>3</sup>, P.F. Crosti<sup>3</sup>, E. Lanzi<sup>3</sup>, G. Meregalli<sup>3</sup>, G. Trocino<sup>3</sup>, A. Liberati<sup>2</sup>

<sup>1</sup> Laboratorio di Epidemiologia dell'Assistenza Sanitaria, Istituto 'Mario Negri', Milano, Italy

<sup>2</sup> Laboratorio di Epidemiologia Clinica, Istituto 'Mario Negri', Milano, Italy

<sup>3</sup> Comitato per la Valutazione e Revisione della Qualità, Ospedale S. Gerardo dei Tintori, Monza, Italy

Correspondence: G. Apolone, MD, Laboratorio di Epidemiologia dell'Assistenza Sanitaria, Istituto Ricerche Farmacologiche 'Mario Negri', Via Eritrea 62, 20157 Milano, Italy, tel. +39 2 39014540, fax +39 2 33200231

ing with private health care facilities or providers. Nationwide there are 5.7 hospital beds per 1,000 inhabitants, with an overall mean length of stay of 9.7 days (1991 data). At the time this study was carried out, the NHS had 3 tiers: the Central Government, the region and the local health unit (LHU). The latter was responsible for the delivery of health care and it was run by administrators appointed by political parties in charge of the local government. Financing came from employee and employers' contributions (about 40%), from Central Government (another 40%) and the rest from the LHU's own sources revenues. Most hospitals were owned and administered by the LHUs and no direct financial accountability was posed on administrators or doctors. From 1995 major changes in financing and organization have been taking place. While the 3 tiers still remain in operation, the main emphasis will be on introducing a form of 'managed competition' by separating 'purchasers' (the LHUs) from 'providers' (public and private health care facilities). All LHUs (whose number has been reduced from over 600 to less than 300) and a few large hospitals (approximately up to 40 in 1995) have become 'independent', being run by general managers (appointed by the regional government) who are supported by medical and administrative directors. Each LHU will receive a capitated fee (set equal to a 1.5 million Italian lira per inhabitant in 1995) from which it has to provide every resident citizen with a 'basic package of services' (called 'livelli uniformi di assistenza'). Hospitals' financing will shift from a global budget largely based on 'historical expenditures' to a prospective payment based on a 'resources-based' classification system.

## METHODS

### The instrument

The AEP is a standardized explicit tool specifically targeted at an audit of hospital care whose characteristics have been exhaustively described by Gertman and Restuccia,<sup>5</sup> Restuccia et al.,<sup>6,9</sup> Strumwasser et al.<sup>7</sup> and Apolone et al.<sup>8</sup> Briefly, the original AEP is a criteria-based decision support tool for determining the medical necessity of hospital admissions and days of care. It consists of sets of generic (i.e. applicable to all patients independently from diagnosis and severity of illness) and explicit (i.e. each criterion represents a pre-set distinct indication for in-patient care that alone justifies the episode of care) criteria for adult medical-surgical, paediatric and elective surgery cases. The standard medical-surgical form – the version adopted in this study as the source instrument – contains 2 separate sets of criteria for admission and stay, further divided in 2 and 3 subsets respectively. The admission section pertains to the patient conditions (n=11 criteria) and clinical services (n=7), while the day of care consists of medical services (n=11), nursing/life support services (n=7) and patient condition (n=9) criteria. Once a day has been identified as medically unnecessary (i.e. no information has been traced in the medical record matching at least 1 of the 28 explicit criteria), the AEP also allows the description of factors potentially responsible for such medically unnecessary episodes of care using a

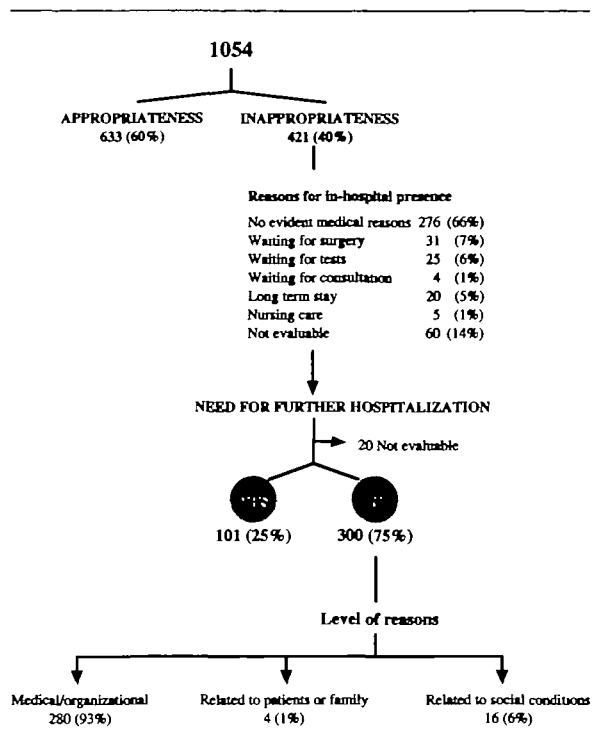

Figure 1 Main results of the study

complementary list of reasons and alternatives. If the hospital day did not meet any criteria, reviewers are also asked to judge implicitly the need for further hospitalization and indicate tentative reasons (see figure 1 for a decision tree scheme).

In the present study, the appropriateness of admission and length of stay was rated using a revised version of the adult medical-surgical AEP where a few changes were made in order to make it more suitable for the Italian setting (this modified version has been previously described and piloted in a study<sup>8</sup> carried out at the same hospital). A short description of the Italian version of the AEP is displayed in figure 2. The full protocol is available from the authors upon request.

### Study design and patient sample

The study was carried out at the S. Gerardo Hospital (Monza, Italy), a 950 bed teaching hospital. In the hospital wards that took part in the study on a voluntary basis (internal medicine, neurology, cardiology, pulmonary disease, gynaecology and general surgery), all patients present in the wards on 3 pre-selected index days (October 1989 and March and June 1990) were considered eligible for the retrospective application of the AEP list of criteria. Medical record reviews were carried out by 6 medically qualified investigators specifically trained in the use of the questionnaire. Reviewers were instructed to base their admission assessment only on the basis of the medical information relative to the day of admission and the following 24 h. Assessment of appropriateness of hospital stay was made only for the index day and not for the entire hospitalization. Each patient's chart was examined, independently, by a pair of reviewers allowing a formal test of inter-rater reliability. The final analysis is

**Admission (Set A–B, 19 criteria)****A : Severity of illness (10 criteria)**

## 1– Pulse rate:

a: less than 50 beats per minute

b: greater than 140 per minutes

## 5– Acute bleeding

## 11– Acute loss of sight and hearing

**B : Intensity of service (9 criteria)**

## 4– Vital sign monitoring need during the day

## 5– Intravenous medications and/or fluid replacement

## 9– Treatments that require continous observations for reactions

**Day of care (Set C–D–E, 23 criteria)****C : Medical services (11 criteria)**

## 1– Procedure in operating room that day

## 5– Biopsy of internal organ that day

## 9– Close medical monitoring by physicians

**D : Nursing/life support (6 criteria)**

## 1– Respiratory care

## 2– Parenteral therapy

## 4– Intake and output measurement

**E : Patient condition (6 criteria)**

## 4– Central nervous system failure within 48 hours

## 5– New acute myocardial infarction or stroke within 14 days before the index day

**Figure 2** Italian version of the appropriateness evaluation protocol: structure and examples

based on data in which discrepancies were solved through discussion among reviewers. Information abstracted from each chart included the patient's name, age, sex, ward attended on the day reviewed, discharge diagnoses (principal and secondary, whenever reported) and overall and pre-index day LOS.

*Statistical analysis*

Three different models were built where proportions of agreement among pairs, rates of inappropriate hospital admission and stays were the dependent variables. The total LOS was used as a stratifying factor when appropriate, to account for the fact that the patient probability of being sampled and reviewed with a cross-sectional approach is proportional to his/her length of stay in hospital<sup>7,9</sup>. The kappa statistic ( $k$ ), a measure that corrects for agreement that may occur by chance, was used to assess the inter-rater reliability.<sup>10,11</sup> The Pearson  $\chi^2$  test was used to test the significance of differences in the rates

of appropriateness between groups. The significance of the linear trend (i.e. the association between inappropriate hospital days and part of stay, operationally broken down into three thirds) was assessed using the Mantel–Haenszel test.<sup>12</sup>

**RESULTS**

A total of 1,082 patient days were identified in the 3 index days (348 in October, 363 in March and 371 in June) and complete data were available for 1,054 (97%). Fifty per cent were males and 57% were younger than 65 years (table 1). The largest number of patients were from 3 general medical ( $n=345$ , 32%) and 3 surgical ( $n=356$ , 34%) wards: 147 (14%) from neurology, 73 (7%) from cardiology, 71 (7%) from pulmonary medicine and 62 (6%) from gynaecology. The mean LOS was 29 days (median 19), with one-quarter longer than 30 days.

*Reliability*

The overall agreement and  $k$  statistic regarding the appropriateness of admission in hospital stay were computed for each pair. Overall, agreement was good in each pair (table 2).

*Appropriateness of admission*

Twenty-seven per cent (289/1054) were inappropriate admissions. Inappropriateness was significantly associated with the day of the week on which the patient was admitted, being highest on Monday and Friday (33%), and lowest on Saturday (12%) and Sunday (18%) ( $p<0.001$ ). Younger patients were more often inappropri-

**Table 1** Characteristics of the study population

| Variables             | Number | %  |
|-----------------------|--------|----|
| Sex                   |        |    |
| Male                  | 530    | 50 |
| Female                | 524    | 50 |
| Age (years)           |        |    |
| 0–24                  | 66     | 6  |
| 25–44                 | 128    | 12 |
| 45–64                 | 411    | 39 |
| 65–74                 | 243    | 23 |
| >74                   | 203    | 20 |
| NE                    | 3      | –  |
| Ward                  |        |    |
| Medicine              | 345    | 32 |
| Surgery               | 356    | 34 |
| Cardiology            | 73     | 7  |
| Neurology             | 147    | 14 |
| Pulmonary             | 71     | 7  |
| Gynaecology           | 62     | 6  |
| Length of stay (days) |        |    |
| 1–3                   | 39     | 4  |
| 4–10                  | 230    | 22 |
| 11–17                 | 206    | 20 |
| 18–24                 | 162    | 15 |
| 25–31                 | 129    | 12 |
| >31                   | 288    | 27 |

NE: non-evaluable

**Table 2** Results of the analysis of inter-rater agreement according to the 3 pairs of chart reviewers

|                    | Pair 1<br>n=334            | Pair 2<br>n=318            | Pair 3<br>n=402            |
|--------------------|----------------------------|----------------------------|----------------------------|
|                    | % agreement -k<br>(95% CI) | % agreement -k<br>(95% CI) | % agreement -k<br>(95% CI) |
| Type of assessment |                            |                            |                            |
| Admission          | 96 -0.91 (0.8-1.0)         | 96 -0.86 (0.75-0.97)       | 97 -0.93 (0.83-1.0)        |
| Stay               | 94 -0.88 (0.77-0.98)       | 92 -0.83 (0.72-0.94)       | 99 -0.97 (0.87-1.0)        |

CI: confidence intervals at the 95% level of the k statistic

ately admitted (31 versus 25% among those younger and older than 65 years respectively) ( $p=0.02$ ). Inappropriate admission rates varied also according to the wards where patients were sampled ( $p<0.001$ ). Neurology (11%), cardiology (15%) and pulmonary medicine (15%) had the lowest rates compared to, in increasing order, internal medicine, surgery and gynaecology wards (25, 39 and 42% respectively). The appropriateness of admission did not vary according to the patients' gender and was quite consistent across the 3 index days reviewed (32% in October, 26% in March and 25% in June).

#### Appropriateness of days of care

The overall proportion of inappropriate admissions in hospital days was 40% (421/1054). Inappropriateness was significantly associated with the type of attending ward ( $p<0.001$ ); for patients seen in gynaecology (16%) and cardiology (21%) wards, the rates were significantly lower than for others. Those sampled in the last third of their stay were more often deemed inappropriate than others (33 versus 37 versus 50%, for days sampled in the first, second and last third respectively,  $p<0.001$ ). Patients inappropriately admitted were also more likely to be classified as inappropriate with respect to the hospital stay (58 versus 33% for inappropriate and appropriate respectively,  $p<0.001$ ). Neither age, gender or other variables were significantly associated with the occurrence of appropriateness (table 3). In approximately 66% of the inappropriate days of stay, no medical reasons could be traced in the records that could explain the stay in hospital during the index day (figure 1). Moreover, 75% ( $n=300$ ) of the days rated as inappropriate were also judged by reviewers as not needing further hospital care. Finally, the distribution of responsibilities in the inappropriate decision to keep patients in hospital is of some interest. Medical (delayed) decisions or hospital (poor) functioning were the justifications claimed by reviewers most of the time for inappropriate stay (93%), while in only 7% cases was the responsibility attributed to the lack of appropriate social or community-based alternatives.

#### Factors associated with appropriateness of day of care

The appropriateness of admission, type of ward and location for the stay of the day reviewed were all significantly associated with appropriateness. Although these findings were consistent with our<sup>8</sup> and other<sup>5,9,13</sup> studies, we further assessed the nature of such putative associations. As is shown in table 4 (left-hand side), in each of the 6 LOS

strata there was a higher rate of inappropriate stay among patients inappropriately admitted. When proper analysis of the association between the location within the stay and the appropriateness of stay was performed (table 4, right-hand side), in all but one stratum, cases sampled in the third

part of their stay were rated more frequently inappropriate than either the first and second thirds. The overall association and linear trend held significant even when cases with inappropriate admission were excluded from the analysis in order to minimize the potential bias due to the inappropriate admission evaluation (table 4, bottom 2 rows). Finally, when medical and surgical services were compared (still stratifying by LOS) we found that patients admitted in medical wards were more likely to be rated inappropriate compared to those in surgical ones (49 versus 35%) (table 5).

**Table 3** Proportions of inappropriate hospital stays according to potential predictors

| Variable                                              | Inappropriate/total | %  | p value |
|-------------------------------------------------------|---------------------|----|---------|
| Admission appropriateness                             |                     |    |         |
| Yes                                                   | 252/765             | 33 | 0.001   |
| No                                                    | 169/289             | 58 |         |
| Sex                                                   |                     |    |         |
| Male                                                  | 210/530             | 40 | 0.8     |
| Female                                                | 211/524             | 40 |         |
| Age (years)                                           |                     |    |         |
| ≤65                                                   | 236/605             | 39 | 0.3     |
| >65                                                   | 187/446             | 42 |         |
| NE                                                    | 3                   |    |         |
| Ward                                                  |                     |    |         |
| Medicine                                              | 168/345             | 49 | 0.001   |
| Surgery                                               | 123/356             | 35 |         |
| Cardiology                                            | 15/73               | 21 |         |
| Neurology                                             | 76/147              | 52 |         |
| Pulmonary                                             | 29/71               | 41 |         |
| Gynaecology                                           | 10/62               | 16 |         |
| Length of stay (days)                                 |                     |    |         |
| 1-3                                                   | 13/39               | 33 | 0.5     |
| 4-10                                                  | 85/230              | 37 |         |
| 11-17                                                 | 92/206              | 45 |         |
| 18-24                                                 | 68/162              | 42 |         |
| 25-31                                                 | 48/129              | 37 |         |
| >31                                                   | 115/288             | 40 |         |
| Location within stay of the day reviewed <sup>a</sup> |                     |    |         |
| First third                                           | 102/306             | 33 | 0.001   |
| Second third                                          | 129/353             | 37 |         |
| Third third                                           | 177/356             | 50 |         |

NE: non-evaluable

a: Stays of 3 days or less not included ( $n=39$ )

**Table 4** Proportions of inappropriate hospital stay according to overall length of stay, type of admission and location of the day reviewed within the stay

|                               | Number of patients | Admission (%)        |                        | Location within stay (%) <sup>a</sup> |                  |                  |
|-------------------------------|--------------------|----------------------|------------------------|---------------------------------------|------------------|------------------|
|                               |                    | Appropriate<br>n=765 | Inappropriate<br>n=289 | 1st/3rd<br>n=306                      | 2nd/3rd<br>n=353 | 3rd/3rd<br>n=356 |
| Overall length of stay (days) |                    |                      |                        |                                       |                  |                  |
| 1-3                           | 39                 | 4                    | 100                    | —                                     | —                | —                |
| 4-10                          | 230                | 29                   | 59                     | 19                                    | 35               | 57               |
| 11-17                         | 206                | 36                   | 59                     | 43                                    | 37               | 56               |
| 18-24                         | 162                | 35                   | 57                     | 37                                    | 35               | 55               |
| 25-31                         | 129                | 32                   | 49                     | 40                                    | 39               | 32               |
| >31                           | 288                | 36                   | 56                     | 38                                    | 36               | 45               |
| Total                         | 1,054              | 33                   | 58 <sup>b</sup>        | 34                                    | 37               | 49 <sup>b</sup>  |
| Total <sup>c</sup>            | 765                | —                    | —                      | 19                                    | 31               | 47 <sup>b</sup>  |

a: Stays of 3 days or less not included

b:  $p < 0.001$ 

c: Inappropriate admissions were excluded (n=289)

The entries in the right-hand side of the table represent the percentages of inappropriate stay in each length of stay stratum.

## DISCUSSION

The AEP is a utilization review tool used to assess whether medical instability, severity of illness or type of clinical services justify in-hospital care for a given patient.<sup>5</sup> The strengths and limitations of the instrument are well known in the United States where it was developed, tested and used several times.<sup>5,6,9,13-16</sup>

In Italy, the revised version which has been adopted has kept its excellent reliability, well comparable with the data reported by Restuccia et al.<sup>6</sup> and other independent authors such as Kemper,<sup>13</sup> Siu et al.,<sup>14</sup> Rishpon et al.,<sup>17</sup> and was able to detect expected phenomena and also identify correlations between inappropriateness and potential predictors.

Inappropriateness estimates are high and not completely surprising for the Italian hospital system where provision

of in-patient care is free of charge and hospital doctors are not required to justify their decisions about prolonging or shortening the stay of patients. Furthermore, the excess of doctors and the lack of nurses and social workers has led to a primary care dominated by general practitioners to whom hospital care is an easy to use surrogate for a lower level of care, in particular for specific categories of patients (i.e. in the case of the elderly a 'premature' hospital admission is sometimes a way to bypass an otherwise long waiting list to obtain access to diagnostic tests). Differences in the rate of inappropriateness among departments are also not surprising and must be investigated with a deeper understanding of the different potential determinants involved. Unanticipated, interesting findings were the low frequency of the so-called 'social factors' responsibilities and the large amount of those generically labelled as 'medical/organizational'. A systematic underestimation of the social factors cannot be ruled out. Recording in a medical record is the doctors' prerogative in Italy and in this sense this may not be an appropriate source of information as social factors may be more easily picked up by nurses. Nevertheless, in a concurrent sample of patients admitted to geriatric wards in the same hospital where the same evaluative approach was adopted (data not shown in this report) the rate of reasons attributed to 'social factors' was somewhat higher (20%).

Two main reservations have been raised relative to the use of the AEP in Italy:

- the criteria could be too strict and
- the assessment could be negatively affected by the poor quality of the medical record.

The claim of strictness deserves some comments. Although each criterion might be judged to be arbitrary to a given extent, we have already seen through Apolone's et al.<sup>8</sup> pilot investigation that, with few exceptions, the AEP criteria could be applied to an average Italian hospital. When we scrutinized the frequencies of the 3 sets of criteria related to the hospital stay, the clinical conditions and/or the need for medical services were met less often. The criterion 'fluid infusion without balance monitoring' turned out to be the criterion most frequently used. This suggests that hospital days are often justified by the AEP criteria related to the intensity service needed, suggesting that an overestimate of appropriateness is more likely to have occurred. Moreover, the limited use of override options (7% of the total sample) indicates that the reviewers felt rather comfortable with the set of explicit

**Table 5** Proportion of inappropriate hospital stays, according to overall length of stay and admitting ward specialty

|                               | Number of patients | Department (%)    |                  |
|-------------------------------|--------------------|-------------------|------------------|
|                               |                    | Medicine<br>n=345 | Surgery<br>n=356 |
| Overall length of stay (days) |                    |                   |                  |
| 1-3                           | 28                 | 75                | 25               |
| 4-10                          | 136                | 57                | 36               |
| 11-17                         | 118                | 58                | 41               |
| 18-24                         | 119                | 52                | 34               |
| 25-31                         | 101                | 41                | 40               |
| >31                           | 199                | 45                | 24               |
| Total                         | 701                | 49                | 35 <sup>a</sup>  |
| Total <sup>b</sup>            | 476                | 39                | 28 <sup>a</sup>  |

a:  $p < 0.001$ 

b: Inappropriate admissions were excluded (n=225)

The entries in the right-hand side of the table represent the percentages of inappropriate stay in each length of stay stratum.

criteria included in the questionnaire. As for the source of the data (i.e. the medical record), all the items used to assess appropriateness belong to the medical care domain and it is customary to record them in the charts, even when they refer to minor procedures like, for instance, the 'fluid infusion' practice. For all these reasons we do believe that incompleteness of the medical record should not therefore represent a major threat to the applicability of the AEP and to the validity of our conclusions.

It must be noted, on the other hand, that the sections of the AEP exploring reasons or responsibilities for inappropriate stay do not seem adequately suited to the Italian system. The most obvious reason is a lack of pertinent reporting in the patient's charts (see the large amount of inappropriate days labelled with 'no evident medical reasons' or 'not evaluable at all'), possibly aggravated by the retrospective approach adopted. It is somewhat puzzling, however, that even in another study carried out more recently using a prospective data collection approach, the frequency of inappropriateness attributable to 'social factors' appeared to be very low. The issue should probably be investigated more closely and it is likely to vary quite substantially in different types of departments.

## CONCLUSIONS

The attention that is increasingly paid in Europe to the promotion of quality of care and assurance activities seems to require simple, reliable and inexpensive systems for regularly reviewing the appropriateness of the care provided. The basic features of the AEP and its good properties when tested outside the US context make it a good candidate to be, in its original form or properly modified, a widely usable screening tool for hospital utilization reviews. It is certainly worth noting that despite the profound differences between the Italian and US health care systems our results do not differ substantially from those that emerged in the USA, in particular when compared to studies carried out before the implementation of the prospective payment system.<sup>6</sup> Whether this indicates that an 'unavoidable inefficiency' affects hospitals' functioning regardless of the specific features of the health care systems might be the result of international comparative surveys worth being planned for the future. For now a European project aimed at assessing the comparability of results obtained in different countries has been launched within the framework of the Biomed Programme.<sup>18</sup> By the end of the project (1996) a formal comparative international study will have been carried out using a common 'European' version of the

AEP together with a standardized list of reasons for inappropriate admission and days of stay.

The protocol, operative materials and preliminary results are available from the authors upon request.

The authors wish to thank Sabrina Bidoli, Daniela Fassina and the G.A. Pfeiffer Memorial Library staff for editorial assistance.

## REFERENCES

- 1 Schieber GJ, Poullier JP. International health care expenditure trends: 1987. *Hlth Affairs* 1989;8:169.
- 2 Kurylo LL. Measuring inappropriate utilization. *Hosp Hlth Serv Admin* 1976;21:73.
- 3 Holroyd BR, Knopp R, Kallsen G. Medical control: quality assurance in prehospital care. *JAMA* 1986;256:1027-31.
- 4 Gaff L, Mucci D, Radford MJ. Decision to hospitalize: objective diagnosis-related group criteria versus clinical judgment. *Ann Emerg Med* 1988;17:943-52.
- 5 Gertman PM, Restuccia JD. The appropriateness evaluation protocol: a technique for assessing unnecessary days of hospital care. *Med Care* 1981;8:855-71.
- 6 Restuccia JD, Kreger BE, Mayne SMC, et al. Factors affecting appropriateness of hospital use in Massachusetts. *Hlth Care Financ Rev* 1986;8:47.
- 7 Strumwasser I, Paranjpe NV, Ronis DL, et al. Reliability and validity of utilization review criteria: appropriateness evaluation protocol, standardized Medreview instrument, and intensity-severity-discharge criteria. *Med Care* 1990;28:95-111.
- 8 Apolone G, Alfieri V, Braga A, et al. A survey on the necessity of the hospitalization day in an Italian teaching hospital. *Qual Assur Hlth Care* 1991;3:1-9.
- 9 Restuccia JD, Gertman P, Dayno SJ, et al. A comparative analysis of appropriateness of hospital use. *Hlth Affairs* 1984;3:130-8.
- 10 Cohen J. A coefficient of agreement for nominal scales. *Educ Psychol Measure* 1960;20:37-46.
- 11 Fleiss JL. Statistical methods for rates and proportions, 2nd edn. New York: Wiley, 1981.
- 12 Schlesselman JJ. Case-control studies: design, conduct and analysis. Oxford: Oxford University Press, 1982.
- 13 Kemper KJ. Medically inappropriate hospital use in a paediatric population. *N Engl J Med* 1988;318:1033-7.
- 14 Siu AL, Sonnenberg FA, Manning WG, et al. Inappropriate use of hospitals in a randomized trial of health insurance plans. *N Engl J Med* 1986;315:1259-66.
- 15 Siu AL, Manning WG, Benjamin B. Patient, provider and hospital characteristics associated with inappropriate hospitalization. *Am J Public Hlth* 1990;80:1253-6.
- 16 Booth BM, Duke RL, Wakefield DS, et al. Non acute utilization of department of Veterans Affairs inpatient services. Background and design of a nationwide study. *Med Care* 1991;29(Suppl):AS29-39.
- 17 Rishpon S, Lubach S, Epstein LM. Reliability of a method of determining the necessity for hospitalization days in Israel. *Med Care* 1986;24:279.
- 18 Liberati A, Apolone G, Lang T, et al. on behalf of the project Steering Group and the Coordinating Center. A European project assessing the appropriateness of hospital utilization: background, objectives and preliminary results. *Int J Qual Hlth Care* 1995;7(3):187-99.

Received 8 March 1995, accepted 21 June 1995
